# Supplementary figures and images for: Enhancement of hepatitis C viral RNA abundance by precursor miR-122 molecules
Source: PubMed Central journal article supplement — RNA. 2013 Dec;19(12):1825–32. doi: 10.1261/rna.040865.113 (PMC3884667; doi:10.1261/rna.040865.113), 2013-12

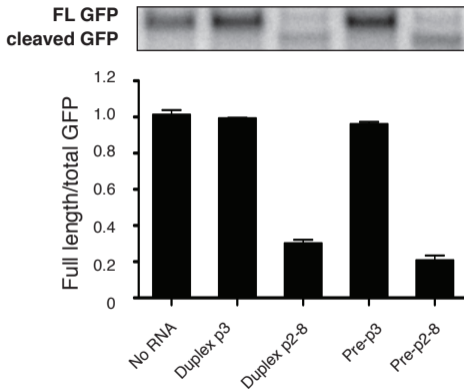

Supp.Fig.S1 Machlin et al.

Supplement: supp_040865.113_SuppFig1.pdf [file supp_040865.113_SuppFig1.pdf]

**A**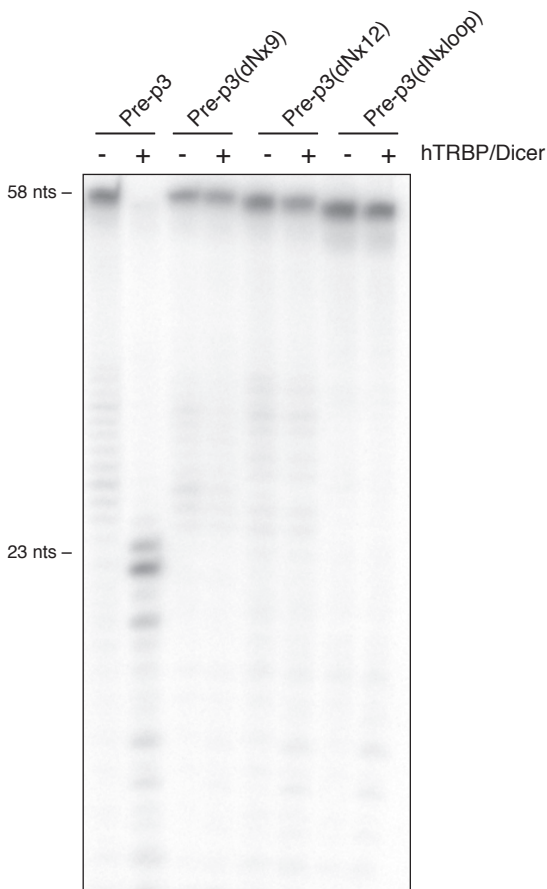**B**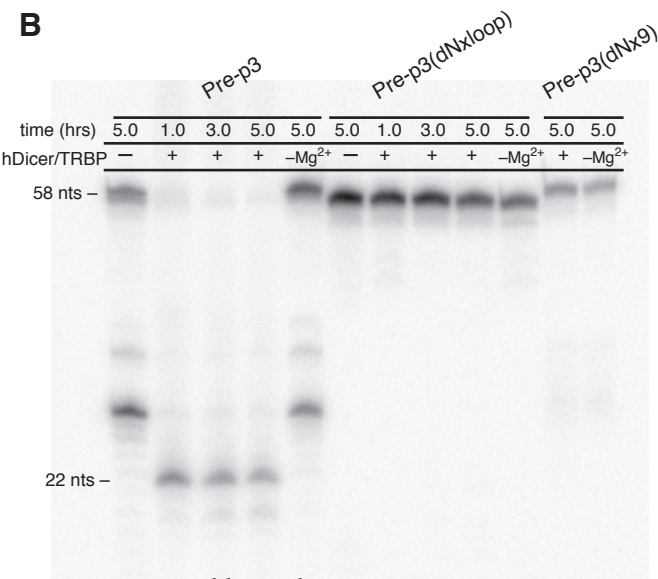

Supplement: supp_040865.113_SuppFig2.pdf [file supp_040865.113_SuppFig2.pdf]

Supp.Fig.S3 Machlin et al.

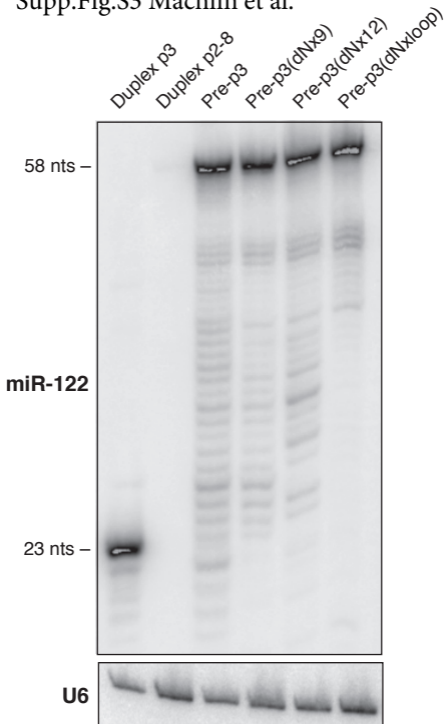

Supplement: supp_040865.113_SuppFig3.pdf [file supp_040865.113_SuppFig3.pdf]

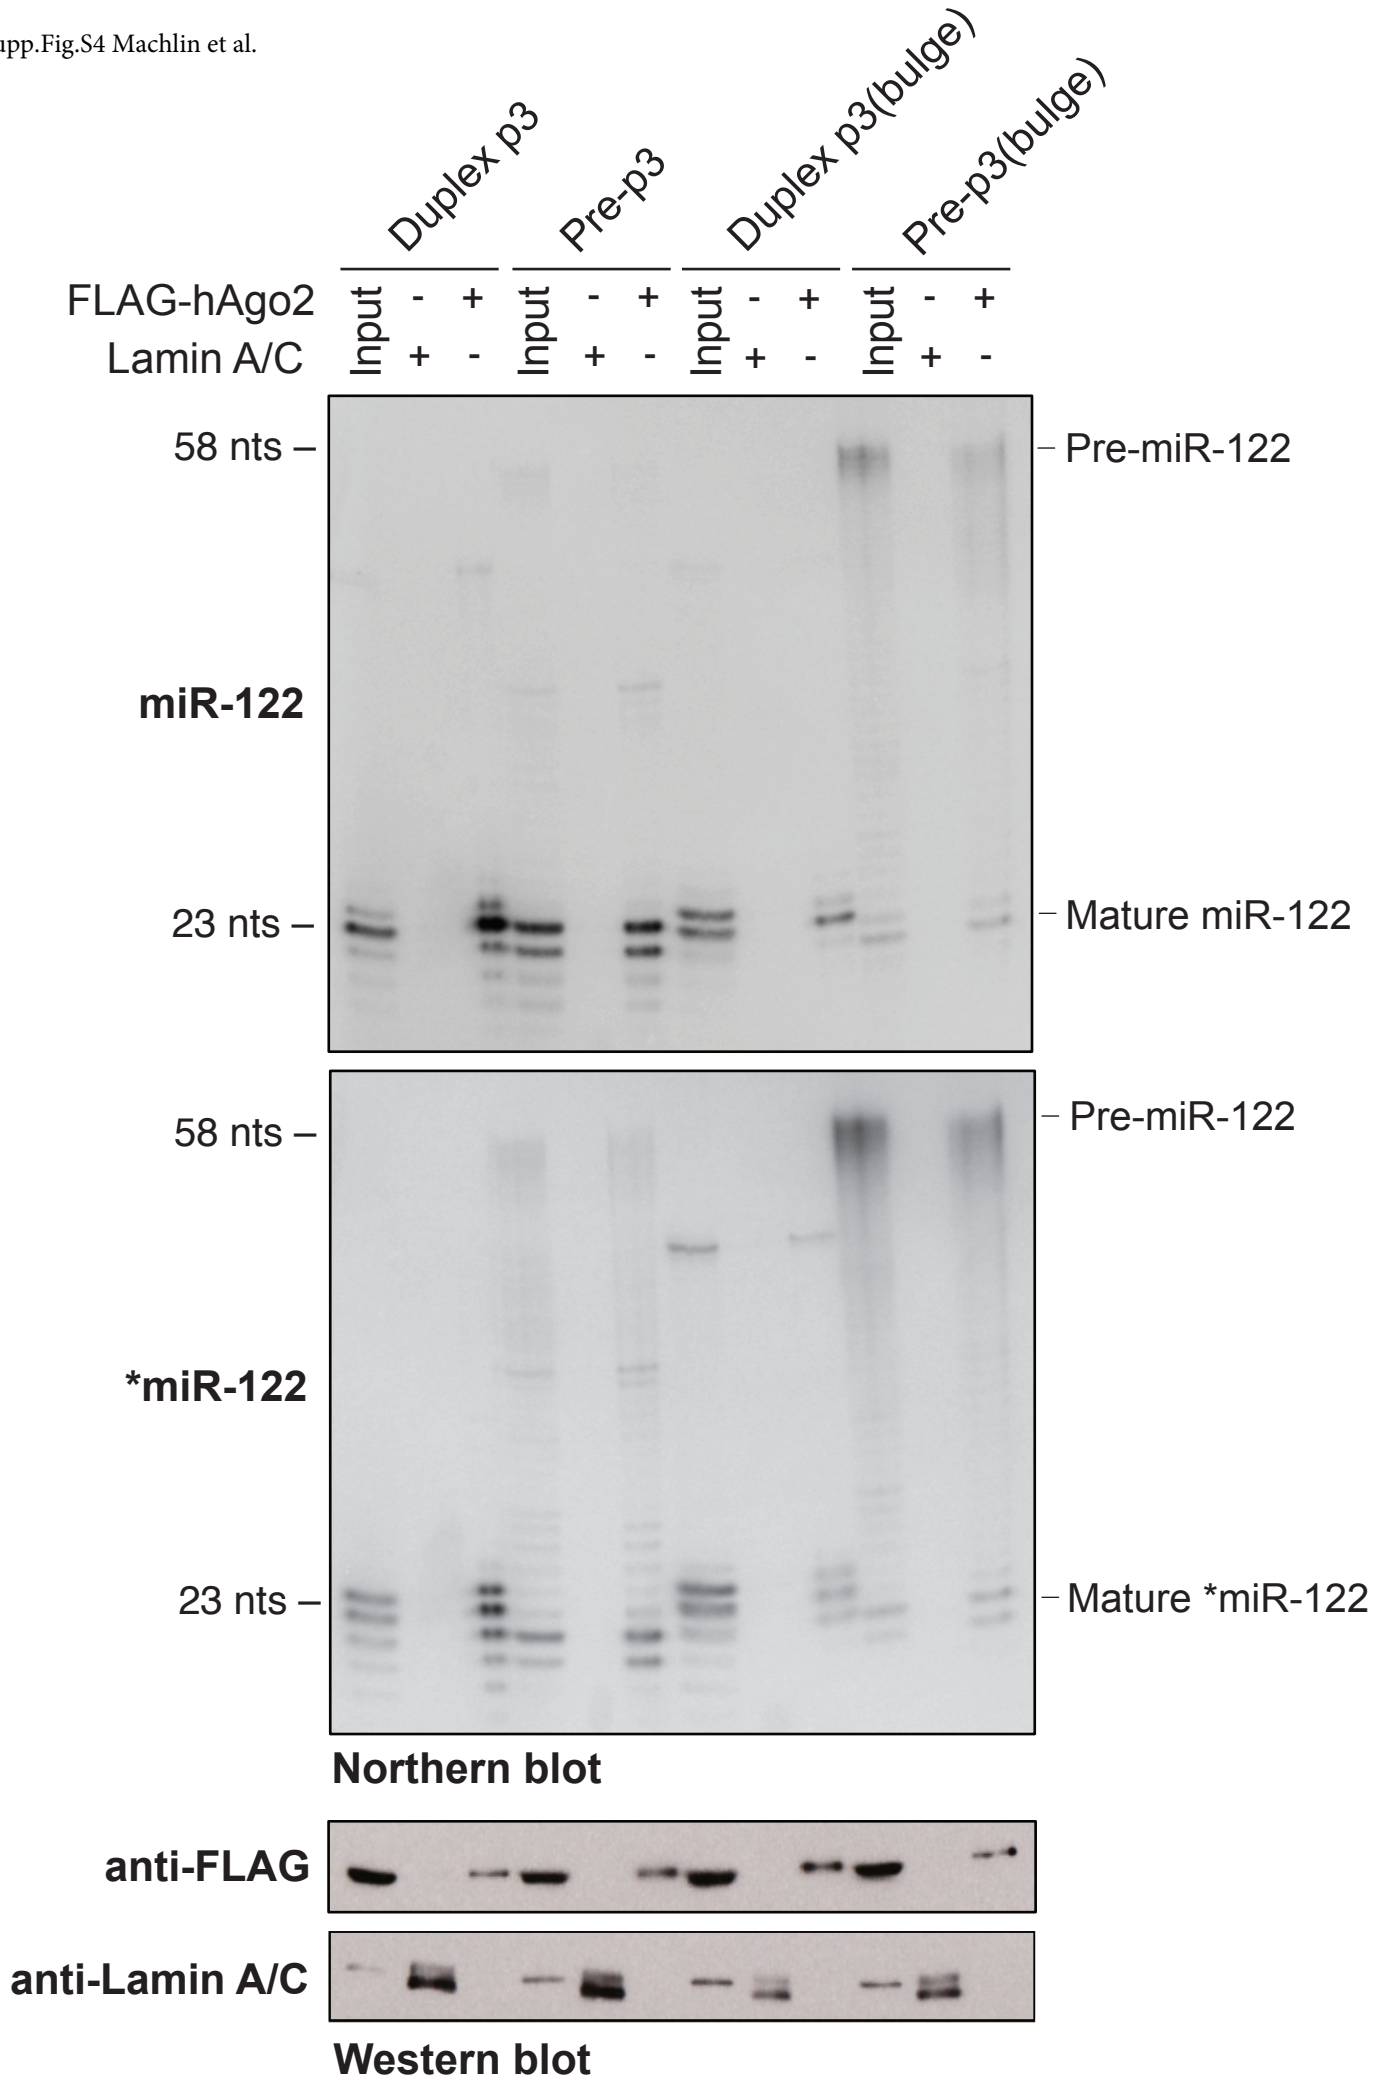

Supplement: supp_040865.113_SuppFig4.pdf [file supp_040865.113_SuppFig4.pdf]
